# Supplementary material for: Biological Pathway-Derived TMB Robustly Predicts the Outcome of Immune Checkpoint Blockade Therapy
Source: MDPI journal article supplement (doi:10.3390/cells11182802), 2022-09-08
Supplement: s1 [file s1]

Dear Editors and Reviewers,

Thanks for your review of our manuscript entitled “Biological pathway derived TMB robustly predicts the outcome of immune checkpoint blockade therapy” (Manuscript ID: cells-1680519). We appreciate the concerns and suggestions provided by you and the reviewers, and have revised our manuscript accordingly.

#### Comments

1. For primary melanoma, the location on the skin has to be indicated. I attach an example. It can be less categories, but it is helpful to sort more specific descriptions from the patient journal into such widely accepted categories to facilitate comparison with other studies.
2. If the biopsy was taken from a melanoma metastasis, it should be explicitly named "metastasis". The anatomical position is in that case not so important, but can be named.
3. If there is no information about the location, it is OK to write "no information". Do not write "melanoma tumor biopsies".
4. Please recheck: "subcutaneousalp, subcutaneous"; "metastasos", "parietal metastasis", "abdonimal nodule"
5. For the overview, all metastatic melanoma are one category. Melanoma without information on location is another category. As it appears that the large majority of your samples were taken from metastases, it might not be necessary in the overview to subdivide the primary melanoma according to location, since the percentages would be rather small. So primary melanoma could be one category for the overview (But it is still important to keep the detailed information in the Table S1, of course!)
6. It is sufficient to give the percentage of male biological gender, as the percentage of the female gender follows from that.
7. Write "+/-" instead of "standard deviation" in the result text.

Response: Thanks for the valuable suggestions. We have carefully checked and revised the clinical information presented in Table S1 (marked in red) and revised the corresponding description in the method section of the manuscript as follows:

“For melanoma, age of the patients ranged from 18 to 90 (average:  $60 \pm 14$ ), and male patients accounted for 67.7%. Majority tumor samples were taken from melanoma metastasis (90%), and the left were taken from the primary melanoma. All samples were taken at stage IV. For NSCLC, age of the patients ranged from 41 to 85 (average:  $63 \pm 9$ ), and male patients accounted for 51.3%. All samples were taken from the lung tumor at stage IV.”

We appreciate the time, expertise, and remarks of all reviewers and editors very much. Upon review of our revised manuscript, we hope that you will find it acceptable for publication on *Cells*.

Sincerely,

An-Yuan Guo

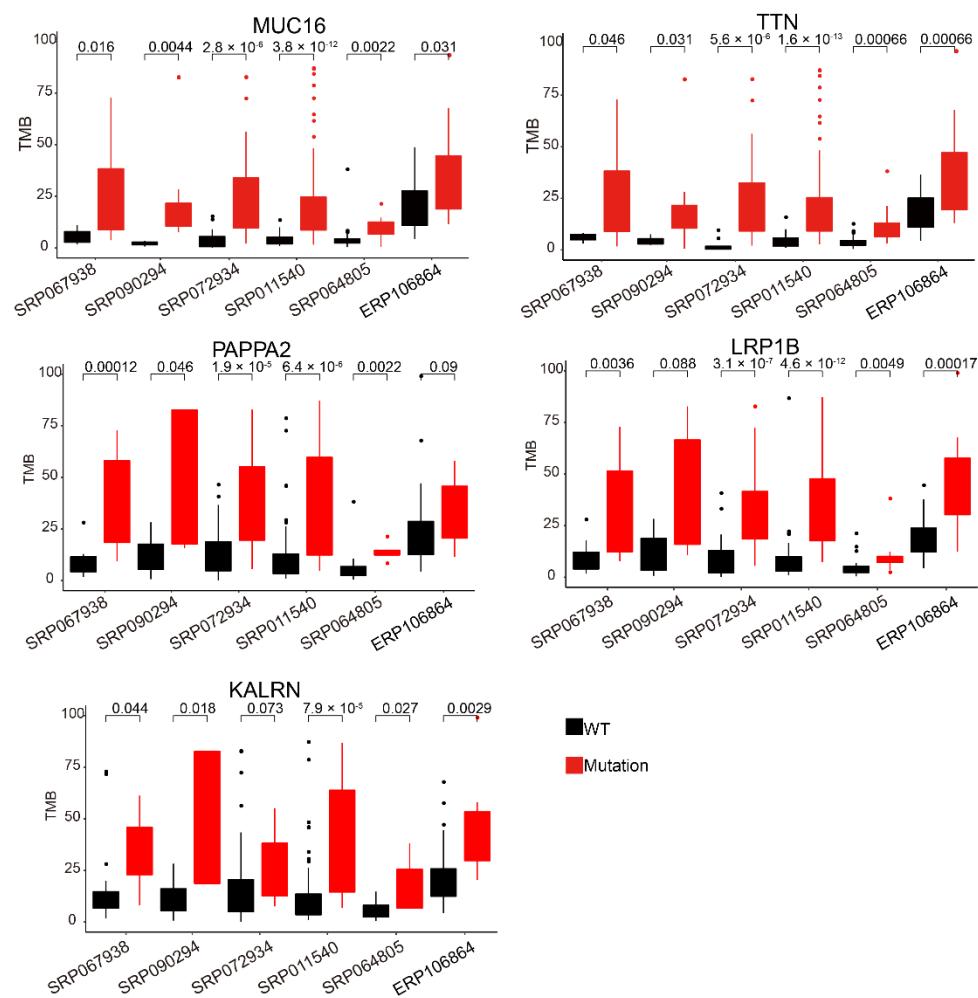

**Figure S1.** Genes that its mutation was significantly correlated with high TMB in all six datasets. TMB was significantly higher in patients with the mutant gene (red color) than in those with wild-type gene (black color). p-value is estimated by Mann-Whitney U test.

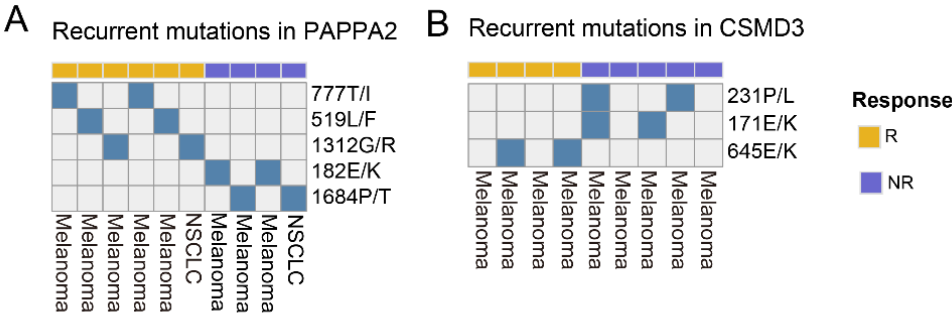

**Figure S2.** Some mutant loci in PAPA2 (A) and CSMD3 (B) occur only in response or non-response samples.

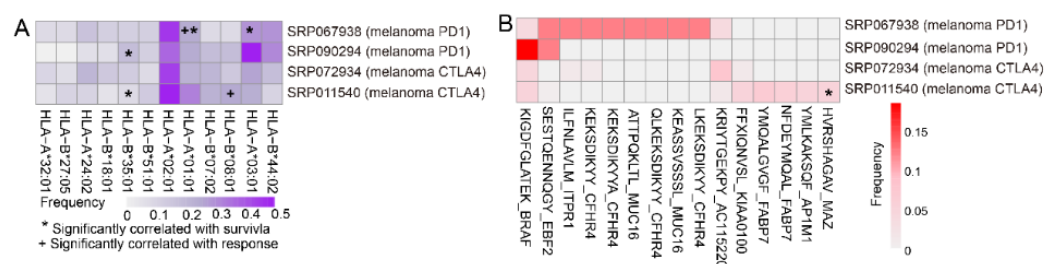

**Figure S3.** Recurrent HLAs (A) and neoantigens (B) in four melanoma datasets. “\*\*” means HLA subtypes were significantly correlated with patient survival (log-rank test  $p$ -value  $< 0.05$ ), and “+” means HLA subtypes were significantly associated with patient response (fisher’s exact test  $p$  value  $< 0.05$ ).

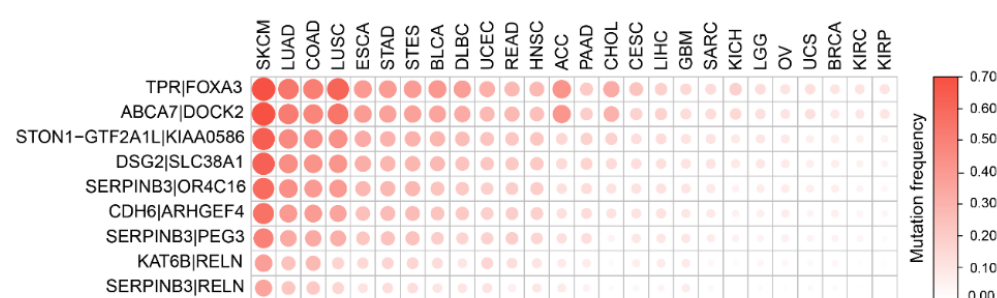

**Figure S4.** Frequency of survival related gene pairs in TCGA cancer samples.

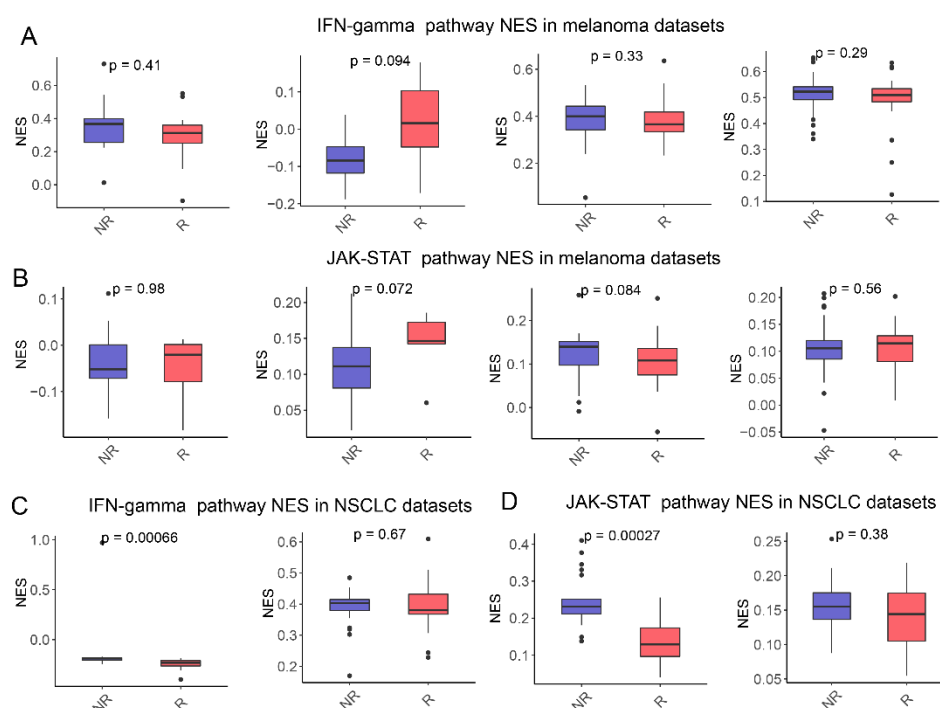

**Figure S5.** Normalized enrichment score (NES) of mutated genes in IFN gamma and JAK-STAT pathways in samples. (A,B) NES of mutated genes in IFN gamma (A) and JAK-STAT (B) pathways in melanoma samples of different datasets. (C,D) NES of mutated genes in IFN gamma (C) and JAK-STAT (D) pathways in NSCLC samples of different datasets.

**Table S1.** Information of samples collected from published data used in this study.

| ID         | Cancer Type         | Sample Location | Stage | Age | Gender | OS (Days) | Status | Anti-Target | Response | Efficacy |
|------------|---------------------|-----------------|-------|-----|--------|-----------|--------|-------------|----------|----------|
| SRR3083837 | metastatic melanoma | metastasis      | IV    | 62  | male   | 948       | Alive  | anti-PD1    | R        | PR       |
| SRR3083839 | metastatic melanoma | metastasis      | IV    | 55  | male   | 927       | Alive  | anti-PD1    | R        | PR       |
| SRR3083841 | metastatic melanoma | metastasis      | IV    | 58  | male   | 691       | Dead   | anti-PD1    | R        | PR       |
| SRR3083843 | metastatic melanoma | metastasis      | IV    | 71  | male   | 1336      | Alive  | anti-PD1    | R        | CR       |
| SRR3083845 | metastatic melanoma | metastasis      | IV    | 70  | male   | 980       | Dead   | anti-PD1    | R        | PR       |
| SRR3083847 | metastatic melanoma | metastasis      | IV    | 45  | male   | 1060      | Alive  | anti-PD1    | R        | PR       |
| SRR3083849 | metastatic melanoma | metastasis      | IV    | 68  | male   | 1054      | Alive  | anti-PD1    | R        | CR       |
| SRR3083851 | metastatic melanoma | metastasis      | IV    | 82  | male   | 439       | Dead   | anti-PD1    | R        | PR       |
| SRR3083853 | metastatic melanoma | metastasis      | IV    | 70  | male   | 974       | Dead   | anti-PD1    | R        | PR       |
| SRR3083855 | metastatic melanoma | metastasis      | IV    | 53  | female | 917       | Alive  | anti-PD1    | R        | CR       |
| SRR3083857 | metastatic melanoma | metastasis      | IV    | 61  | male   | 439       | Alive  | anti-PD1    | R        | PR       |
| SRR3083859 | metastatic melanoma | metastasis      | IV    | 64  | male   | 1081      | Alive  | anti-PD1    | R        | PR       |
| SRR3083861 | metastatic melanoma | metastasis      | IV    | 60  | male   | 945       | Dead   | anti-PD1    | R        | PR       |
| SRR3083863 | metastatic melanoma | metastasis      | IV    | 51  | male   | 882       | Alive  | anti-PD1    | R        | PR       |
| SRR3083865 | metastatic melanoma | metastasis      | IV    | 66  | female | 607       | Dead   | anti-PD1    | NR       | PD       |
| SRR3083866 | metastatic melanoma | metastasis      | IV    | 66  | female | 607       | Dead   | anti-PD1    | NR       | PD       |
| SRR3083868 | metastatic melanoma | metastasis      | IV    | 27  | female | 54        | Alive  | anti-PD1    | NR       | PD       |
| SRR3083870 | metastatic melanoma | metastasis      | IV    | 55  | female | 662       | Dead   | anti-PD1    | NR       | PD       |
| SRR3083872 | metastatic melanoma | metastasis      | IV    | 63  | female | 337       | Dead   | anti-PD1    | NR       | PD       |
| SRR3083874 | metastatic melanoma | metastasis      | IV    | 63  | male   | 103       | Dead   | anti-PD1    | NR       | PD       |
| SRR3083876 | metastatic melanoma | metastasis      | IV    | 84  | male   | 269       | Dead   | anti-PD1    | NR       | PD       |
| SRR3083878 | metastatic melanoma | metastasis      | IV    | 55  | male   | 182       | Dead   | anti-PD1    | NR       | PD       |
| SRR3083880 | metastatic melanoma | metastasis      | IV    | 74  | male   | 262       | Dead   | anti-PD1    | NR       | PD       |
| SRR3083882 | metastatic melanoma | metastasis      | IV    | 59  | male   | 327       | Dead   | anti-PD1    | NR       | PD       |

|            |                     |                             |    |    |        |      |       |            |    |     |
|------------|---------------------|-----------------------------|----|----|--------|------|-------|------------|----|-----|
| SRR4289715 | metastatic melanoma | metastasis (R leg)          | IV | 69 | male   | NA   | Alive | anti-PD1   | R  | CR  |
| SRR4289725 | metastatic melanoma | metastasis (R upper arm)    | IV | 83 | male   | 548  | Alive | anti-PD1   | R  | CR  |
| SRR4289726 | metastatic melanoma | metastasis (R upper back)   | IV | 83 | male   | 548  | Alive | anti-PD1   | R  | CR  |
| SRR4289734 | metastatic melanoma | metastasis (groin)          | IV | 80 | female | 2177 | Alive | anti-PD1   | R  | CR  |
| SRR4289736 | metastatic melanoma | metastasis (abdominal wall) | IV | 42 | male   | 418  | Alive | anti-PD1   | R  | CR  |
| SRR4289738 | metastatic melanoma | metastasis (flank)          | IV | 65 | female | 427  | Alive | anti-PD1   | R  | PR  |
| SRR4289742 | metastatic melanoma | metastasis (small bowel)    | IV | 70 | female | 364  | Alive | anti-PD1   | R  | PR  |
| SRR4289744 | metastatic melanoma | metastasis (cervical)       | IV | 57 | female | 448  | Alive | anti-PD1   | R  | PR  |
| SRR4289717 | metastatic melanoma | metastasis (cervical)       | IV | 60 | male   | 387  | Alive | anti-PD1   | NR | PD  |
| SRR4289719 | metastatic melanoma | metastasis (L face)         | IV | 37 | male   | 467  | Dead  | anti-PD1   | NR | PD  |
| SRR4289721 | metastatic melanoma | metastasis (lung)           | IV | 19 | male   | 186  | Dead  | anti-PD1   | NR | PD  |
| SRR4289723 | metastatic melanoma | metastasis (cervical)       | IV | 67 | male   | 953  | Dead  | anti-PD1   | NR | PD  |
| SRR4289728 | metastatic melanoma | metastasis (caecum)         | IV | 80 | female | 100  | Dead  | anti-PD1   | NR | PD  |
| SRR4289730 | metastatic melanoma | metastasis (sigmoid colon)  | IV | 47 | male   | 704  | Alive | anti-PD1   | NR | PD  |
| SRR4289732 | metastatic melanoma | metastasis (abdominal wall) | IV | 47 | male   | 171  | Dead  | anti-PD1   | NR | PD  |
| SRR4289740 | metastatic melanoma | metastasis (armpit)         | IV | 61 | female | 837  | Dead  | anti-PD1   | NR | PD  |
| SRR3341169 | metastatic melanoma | metastasis (groin)          | IV | 74 | male   | 2081 | alive | anti-CTLA4 | R  | LTB |
| SRR3341171 | metastatic melanoma | metastasis (scalp )         | IV | 49 | female | 767  | alive | anti-CTLA4 | R  | LTB |
| SRR3341173 | metastatic melanoma | metastasis (L thigh )       | IV | 79 | female | 1351 | dead  | anti-CTLA4 | R  | LTB |
| SRR3341175 | metastatic melanoma | metastasis (gluteal )       | IV | 54 | female | 1643 | alive | anti-CTLA4 | R  | LTB |
| SRR3341177 | metastatic melanoma | metastasis (lung )          | IV | 71 | male   | 1570 | alive | anti-CTLA4 | R  | LTB |
| SRR3341179 | metastatic melanoma | metastasis (breast )        | IV | 70 | male   | 986  | alive | anti-CTLA4 | R  | LTB |
| SRR3341181 | metastatic melanoma | metastasis (groin )         | IV | 63 | male   | 1971 | alive | anti-CTLA4 | R  | LTB |
| SRR3341183 | metastatic melanoma | metastasis (elbow )         | IV | 66 | female | 694  | alive | anti-CTLA4 | R  | LTB |
| SRR3341185 | melanoma            | left axillary lymph nodes   | IV | 81 | male   | 949  | dead  | anti-CTLA4 | R  | LTB |

|            |                     |                                    |    |    |        |      |       |            |    |     |
|------------|---------------------|------------------------------------|----|----|--------|------|-------|------------|----|-----|
| SRR3341189 | metastatic melanoma | metastasis (coracoid )             | IV | 65 | male   | 1935 | alive | anti-CTLA4 | R  | LTB |
| SRR3341191 | metastatic melanoma | metastasis (portal lymph node )    | IV | 70 | male   | 1606 | alive | anti-CTLA4 | R  | LTB |
| SRR3341199 | melanoma            | melanoma (small bowel )            | IV | 33 | male   | 986  | alive | anti-CTLA4 | R  | LTB |
| SRR3341201 | metastatic melanoma | metastasis (Left parietal brain )  | IV | 36 | female | 1205 | alive | anti-CTLA4 | R  | LTB |
| SRR3341203 | metastatic melanoma | metastasis (lymph node)            | IV | 74 | male   | 1059 | alive | anti-CTLA4 | R  | LTB |
| SRR3341205 | metastasis melanoma | metastasis (vetebral )             | IV | 62 | male   | 2665 | alive | anti-CTLA4 | R  | LTB |
| SRR3341207 | melanoma            | not available                      | IV | 52 | male   | 767  | alive | anti-CTLA4 | R  | LTB |
| SRR3341209 | melanoma            | not available                      | IV | 55 | male   | 1241 | alive | anti-CTLA4 | R  | LTB |
| SRR3341267 | metastatic melanoma | metastasis                         | IV | 78 | male   | 1533 | alive | anti-CTLA4 | R  | LTB |
| SRR3341269 | melanoma            | lymph nodes                        | IV | 44 | male   | 767  | alive | anti-CTLA4 | R  | LTB |
| SRR3341271 | metastatic melanoma | metastasis                         | IV | 75 | male   | 2227 | alive | anti-CTLA4 | R  | LTB |
| SRR3341273 | metastatic melanoma | metastasis                         | IV | 65 | female | 2190 | alive | anti-CTLA4 | R  | LTB |
| SRR3341275 | melanoma            | lymph nodes                        | IV | 57 | female | 2227 | alive | anti-CTLA4 | R  | LTB |
| SRR3341277 | metastatic melanoma | metastasis (axillary soft tissue ) | IV | 43 | female | 1059 | dead  | anti-CTLA4 | R  | LTB |
| SRR3341279 | metastatic melanoma | metastasis (parietal )             | IV | 70 | male   | 730  | alive | anti-CTLA4 | R  | LTB |
| SRR3341283 | metastatic melanoma | metastasis (lung )                 | IV | 39 | female | 1424 | alive | anti-CTLA4 | R  | LTB |
| SRR3341187 | metastatic melanoma | metastasis (adrenal gland )        | IV | 62 | male   | 1460 | alive | anti-CTLA4 | NR | MNB |
| SRR3341193 | metastatic melanoma | metastasis (small bowel)           | IV | 49 | male   | 767  | alive | anti-CTLA4 | NR | MNB |
| SRR3341195 | metastatic melanoma | metastasis (spleen )               | IV | 71 | male   | 621  | alive | anti-CTLA4 | NR | MNB |
| SRR3341197 | metastatic melanoma | metastasis (inguinal )             | IV | 40 | female | 2628 | alive | anti-CTLA4 | NR | MNB |
| SRR3341211 | melanoma            | L axillary lymph node              | IV | 68 | male   | 1679 | alive | anti-CTLA4 | NR | MNB |
| SRR3341213 | metastatic melanoma | metastasis                         | IV | 71 | female | 986  | dead  | anti-CTLA4 | NR | MNB |
| SRR3341215 | metastatic melanoma | metastasis                         | IV | 43 | male   | 949  | dead  | anti-CTLA4 | NR | MNB |
| SRR3341217 | metastatic melanoma | metastasis (lymph node )           | IV | 82 | female | 1533 | alive | anti-CTLA4 | NR | MNB |
| SRR3341219 | melanoma            | groin lymph nodes                  | IV | 68 | male   | 548  | dead  | anti-CTLA4 | NR | MNB |
| SRR3341221 | melanoma            | R occipital brain                  | IV | 18 | male   | 292  | dead  | anti-CTLA4 | NR | MNB |

|            |                     |                                |    |    |        |      |       |            |    |     |
|------------|---------------------|--------------------------------|----|----|--------|------|-------|------------|----|-----|
| SRR3341223 | metastatic melanoma | metastasis (gluteal)           | IV | 68 | female | 402  | dead  | anti-CTLA4 | NR | MNB |
| SRR3341225 | melanoma            | inguinal lymph nodes           | IV | 50 | male   | 183  | dead  | anti-CTLA4 | NR | MNB |
| SRR3341227 | metastatic melanoma | metastatic                     | IV | 55 | male   | 110  | dead  | anti-CTLA4 | NR | MNB |
| SRR3341229 | metastatic melanoma | metastasis (R elbow)           | IV | 42 | male   | 621  | dead  | anti-CTLA4 | NR | MNB |
| SRR3341231 | melanoma            | not available                  | IV | 54 | male   | 73   | dead  | anti-CTLA4 | NR | MNB |
| SRR3341233 | metastatic melanoma | metastasis                     | IV | 59 | male   | 183  | dead  | anti-CTLA4 | NR | MNB |
| SRR3341235 | metastatic melanoma | metastasis (small bowel )      | IV | 48 | female | 146  | dead  | anti-CTLA4 | NR | MNB |
| SRR3341237 | metastatic melanoma | metastasis                     | IV | 79 | female | 256  | dead  | anti-CTLA4 | NR | MNB |
| SRR3341239 | melanoma            | axillary lymph nodes           | IV | 58 | female | 183  | dead  | anti-CTLA4 | NR | MNB |
| SRR3341241 | metastatic melanoma | metastasis (L temporal brain)  | IV | 46 | female | 438  | dead  | anti-CTLA4 | NR | MNB |
| SRR3341243 | metastatic melanoma | metastasis (R chest wall)      | IV | 64 | male   | 292  | dead  | anti-CTLA4 | NR | MNB |
| SRR3341245 | metastatic melanoma | metastasis (R axillary)        | IV | 64 | male   | 292  | dead  | anti-CTLA4 | NR | MNB |
| SRR3341247 | melanoma            | axillary lymph nodes           | IV | 69 | male   | 146  | dead  | anti-CTLA4 | NR | MNB |
| SRR3341249 | metastatic melanoma | metastasis (anterior chest)    | IV | 67 | female | 438  | dead  | anti-CTLA4 | NR | MNB |
| SRR3341251 | melanoma            | not available                  | IV | 77 | male   | 365  | dead  | anti-CTLA4 | NR | MNB |
| SRR3341253 | melanoma            | abdomen                        | IV | 50 | male   | 73   | dead  | anti-CTLA4 | NR | MNB |
| SRR3341255 | melanoma            | small bowel resection          | IV | 64 | female | 219  | dead  | anti-CTLA4 | NR | MNB |
| SRR3341257 | melanoma            | L arm melanoma                 | IV | 74 | male   | 986  | dead  | anti-CTLA4 | NR | MNB |
| SRR3341259 | metastatic melanoma | metastasis (R chest wall)      | IV | 63 | female | 438  | dead  | anti-CTLA4 | NR | MNB |
| SRR3341261 | melanoma            | left inguinal lymph nodes      | IV | 38 | female | 767  | dead  | anti-CTLA4 | NR | MNB |
| SRR3341263 | metastatic melanoma | metastasis (forearm)           | IV | 90 | male   | 2884 | dead  | anti-CTLA4 | NR | MNB |
| SRR3341281 | metastatic melanoma | metastases (groin lymph node ) | IV | 61 | female | 292  | dead  | anti-CTLA4 | NR | MNB |
| SRR3341285 | metastatic melanoma | metastasis (upper back )       | IV | 55 | male   | 438  | dead  | anti-CTLA4 | NR | MNB |
| SRR3341289 | melanoma            | abdominal tumor nodules        | IV | 52 | male   | 584  | dead  | anti-CTLA4 | NR | MNB |
| SRR3341293 | metastatic melanoma | metastasis (small bowel )      | IV | 63 | female | 256  | dead  | anti-CTLA4 | NR | MNB |
| SRR3341295 | metastatic melanoma | metastasis (breast)            | IV | 50 | female | 730  | dead  | anti-CTLA4 | NR | MNB |
| SRR2588053 | metastatic melanoma | metastasis                     | IV | 59 | male   | 1005 | alive | anti-CTLA4 | R  | PR  |



|            |                     |            |    |    |        |      |       |            |    |    |
|------------|---------------------|------------|----|----|--------|------|-------|------------|----|----|
| SRR2589393 | metastatic melanoma | metastasis | IV | 41 | male   | 1047 | alive | anti-CTLA4 | R  | PR |
| SRR2589478 | metastatic melanoma | metastasis | IV | 70 | male   | 1048 | dead  | anti-CTLA4 | R  | PR |
| SRR2661602 | metastatic melanoma | metastasis | IV | 45 | male   | 1539 | alive | anti-CTLA4 | R  | PR |
| SRR2661932 | metastatic melanoma | metastasis | IV | 68 | male   | 301  | dead  | anti-CTLA4 | R  | PR |
| SRR2663954 | metastatic melanoma | metastasis | IV | 74 | female | 971  | alive | anti-CTLA4 | R  | PR |
| SRR2674312 | metastatic melanoma | metastasis | IV | 81 | male   | 676  | alive | anti-CTLA4 | R  | PR |
| SRR2677533 | metastatic melanoma | metastasis | IV | 73 | male   | 914  | alive | anti-CTLA4 | R  | PR |
| SRR2679057 | metastatic melanoma | metastasis | IV | 50 | female | 853  | dead  | anti-CTLA4 | NR | SD |
| SRR2681131 | metastatic melanoma | metastasis | IV | 61 | male   | 1379 | alive | anti-CTLA4 | NR | PD |
| SRR2693653 | metastatic melanoma | metastasis | IV | 44 | female | 653  | alive | anti-CTLA4 | NR | SD |
| SRR2702801 | metastatic melanoma | metastasis | IV | 81 | male   | 676  | dead  | anti-CTLA4 | NR | SD |
| SRR2703695 | metastatic melanoma | metastasis | IV | 22 | male   | 1027 | alive | anti-CTLA4 | NR | PD |
| SRR2717684 | metastatic melanoma | metastasis | IV | 68 | female | 811  | dead  | anti-CTLA4 | NR | PD |
| SRR2723814 | metastatic melanoma | metastasis | IV | 71 | male   | 987  | alive | anti-CTLA4 | R  | PR |
| SRR2727854 | metastatic melanoma | metastasis | IV | 61 | male   | 808  | alive | anti-CTLA4 | NR | PD |
| SRR2740217 | metastatic melanoma | metastasis | IV | 54 | male   | 749  | alive | anti-CTLA4 | NR | PD |
| SRR2757072 | metastatic melanoma | metastasis | IV | 69 | male   | 801  | dead  | anti-CTLA4 | R  | PR |
| SRR2757601 | metastatic melanoma | metastasis | IV | 67 | male   | 1487 | alive | anti-CTLA4 | R  | CR |
| SRR2765066 | metastatic melanoma | metastasis | IV | 48 | male   | 724  | dead  | anti-CTLA4 | NR | SD |
| SRR2765304 | metastatic melanoma | metastasis | IV | 60 | female | 989  | alive | anti-CTLA4 | NR | SD |
| SRR2770259 | metastatic melanoma | metastasis | IV | 78 | male   | 732  | dead  | anti-CTLA4 | NR | PD |
| SRR2770409 | metastatic melanoma | metastasis | IV | 65 | male   | 1039 | alive | anti-CTLA4 | R  | CR |
| SRR2771788 | metastatic melanoma | metastasis | IV | 77 | male   | 1184 | dead  | anti-CTLA4 | NR | PD |
| SRR2772131 | metastatic melanoma | metastasis | IV | 39 | female | 1478 | dead  | anti-CTLA4 | NR | SD |
| SRR2772336 | metastatic melanoma | metastasis | IV | 77 | male   | 641  | alive | anti-CTLA4 | R  | PR |

|            |                     |            |    |    |        |      |       |            |    |    |
|------------|---------------------|------------|----|----|--------|------|-------|------------|----|----|
| SRR2772697 | metastatic melanoma | metastasis | IV | 71 | male   | 442  | dead  | anti-CTLA4 | R  | PR |
| SRR2772803 | metastatic melanoma | metastasis | IV | 21 | male   | 1029 | alive | anti-CTLA4 | R  | PR |
| SRR2772900 | metastatic melanoma | metastasis | IV | 78 | male   | 1106 | alive | anti-CTLA4 | R  | CR |
| SRR2773166 | metastatic melanoma | metastasis | IV | 42 | female | 1632 | alive | anti-CTLA4 | NR | SD |
| SRR2773334 | metastatic melanoma | metastasis | IV | 67 | male   | 790  | alive | anti-CTLA4 | NR | PD |
| SRR2773533 | metastatic melanoma | metastasis | IV | 82 | male   | 1326 | alive | anti-CTLA4 | R  | R  |
| SRR2777240 | metastatic melanoma | metastasis | IV | 51 | male   | 842  | alive | anti-CTLA4 | NR | PD |
| SRR2777655 | metastatic melanoma | metastasis | IV | 36 | male   | 1034 | alive | anti-CTLA4 | NR | SD |
| SRR2779374 | metastatic melanoma | metastasis | IV | 36 | male   | 1050 | alive | anti-CTLA4 | NR | SD |
| SRR2780332 | metastatic melanoma | metastasis | IV | 55 | female | 798  | alive | anti-CTLA4 | NR | PD |
| SRR2891925 | metastatic melanoma | metastasis | IV | 57 | female | 688  | alive | anti-CTLA4 | R  | PR |
| SRR2587585 | metastatic melanoma | metastasis | IV | 55 | male   | 293  | dead  | anti-CTLA4 | NR | SD |
| SRR2587785 | metastatic melanoma | metastasis | IV | 61 | female | 100  | dead  | anti-CTLA4 | NR | PD |
| SRR2588166 | metastatic melanoma | metastasis | IV | 57 | female | 271  | dead  | anti-CTLA4 | NR | PD |
| SRR2588422 | metastatic melanoma | metastasis | IV | 57 | female | 140  | dead  | anti-CTLA4 | NR | PD |
| SRR2588549 | metastatic melanoma | metastasis | IV | 46 | male   | 122  | dead  | anti-CTLA4 | NR | PD |
| SRR2589158 | metastatic melanoma | metastasis | IV | 69 | male   | 325  | dead  | anti-CTLA4 | NR | PD |
| SRR2589276 | metastatic melanoma | metastasis | IV | 71 | female | 38   | dead  | anti-CTLA4 | NR | PD |
| SRR2589694 | metastatic melanoma | metastasis | IV | 50 | female | 115  | dead  | anti-CTLA4 | NR | PD |
| SRR2589808 | metastatic melanoma | metastasis | IV | 83 | male   | 106  | dead  | anti-CTLA4 | NR | PD |
| SRR2663198 | metastatic melanoma | metastasis | IV | 74 | male   | 34   | dead  | anti-CTLA4 | NR | PD |
| SRR2665040 | metastatic melanoma | metastasis | IV | 31 | male   | 77   | dead  | anti-CTLA4 | NR | NR |
| SRR2668212 | metastatic melanoma | metastasis | IV | 74 | male   | 139  | dead  | anti-CTLA4 | NR | PD |
| SRR2670626 | metastatic melanoma | metastasis | IV | 76 | male   | 542  | dead  | anti-CTLA4 | NR | PD |
| SRR2670951 | metastatic melanoma | metastasis | IV | 63 | male   | 137  | dead  | anti-CTLA4 | NR | PD |

|            |                     |            |    |    |        |     |      |            |    |    |
|------------|---------------------|------------|----|----|--------|-----|------|------------|----|----|
| SRR2675035 | metastatic melanoma | metastasis | IV | 33 | male   | 161 | dead | anti-CTLA4 | NR | PD |
| SRR2675269 | metastatic melanoma | metastasis | IV | 45 | male   | 145 | dead | anti-CTLA4 | NR | PD |
| SRR2677161 | metastatic melanoma | metastasis | IV | 68 | male   | 89  | dead | anti-CTLA4 | NR | PD |
| SRR2677297 | metastatic melanoma | metastasis | IV | 65 | male   | 211 | dead | anti-CTLA4 | NR | PD |
| SRR2678485 | metastatic melanoma | metastasis | IV | 76 | male   | 602 | dead | anti-CTLA4 | NR | PD |
| SRR2679013 | metastatic melanoma | metastasis | IV | 36 | female | 160 | dead | anti-CTLA4 | NR | PD |
| SRR2679085 | metastatic melanoma | metastasis | IV | 48 | male   | 108 | dead | anti-CTLA4 | NR | PD |
| SRR2680970 | metastatic melanoma | metastasis | IV | 73 | male   | 193 | dead | anti-CTLA4 | NR | PD |
| SRR2682345 | metastatic melanoma | metastasis | IV | 54 | female | 104 | dead | anti-CTLA4 | NR | PD |
| SRR2684746 | metastatic melanoma | metastasis | IV | 58 | male   | 99  | dead | anti-CTLA4 | NR | PD |
| SRR2689326 | metastatic melanoma | metastasis | IV | 72 | male   | 147 | dead | anti-CTLA4 | NR | PD |
| SRR2692147 | metastatic melanoma | metastasis | IV | 55 | female | 211 | dead | anti-CTLA4 | NR | PD |
| SRR2706574 | metastatic melanoma | metastasis | IV | 69 | female | 86  | dead | anti-CTLA4 | NR | NR |
| SRR2707236 | metastatic melanoma | metastasis | IV | 54 | female | 628 | dead | anti-CTLA4 | NR | PD |
| SRR2709858 | metastatic melanoma | metastasis | IV | 29 | male   | 113 | dead | anti-CTLA4 | NR | PD |
| SRR2712344 | metastatic melanoma | metastasis | IV | 71 | male   | 153 | dead | anti-CTLA4 | NR | PD |
| SRR2726249 | metastatic melanoma | metastasis | IV | 73 | male   | 208 | dead | anti-CTLA4 | NR | PD |
| SRR2731893 | metastatic melanoma | metastasis | IV | 29 | female | 81  | dead | anti-CTLA4 | NR | PD |
| SRR2732125 | metastatic melanoma | metastasis | IV | 43 | female | 250 | dead | anti-CTLA4 | NR | PD |
| SRR2741440 | metastatic melanoma | metastasis | IV | 70 | male   | 360 | dead | anti-CTLA4 | NR | PD |
| SRR2747280 | metastatic melanoma | metastasis | IV | 66 | male   | 466 | dead | anti-CTLA4 | NR | PD |
| SRR2747991 | metastatic melanoma | metastasis | IV | 78 | male   | 146 | dead | anti-CTLA4 | NR | PD |
| SRR2753222 | metastatic melanoma | metastasis | IV | 45 | female | 237 | dead | anti-CTLA4 | NR | SD |
| SRR2753967 | metastatic melanoma | metastasis | IV | 35 | female | 84  | dead | anti-CTLA4 | NR | PD |
| SRR2760983 | metastatic melanoma | metastasis | IV | 75 | male   | 288 | dead | anti-CTLA4 | NR | PD |

|            |                     |            |    |    |        |     |       |            |    |    |
|------------|---------------------|------------|----|----|--------|-----|-------|------------|----|----|
| SRR2762331 | metastatic melanoma | metastasis | IV | 69 | male   | 83  | dead  | anti-CTLA4 | NR | PD |
| SRR2767414 | metastatic melanoma | metastasis | IV | 50 | male   | 408 | dead  | anti-CTLA4 | NR | PD |
| SRR2767760 | metastatic melanoma | metastasis | IV | 59 | female | 652 | dead  | anti-CTLA4 | NR | PD |
| SRR2768297 | metastatic melanoma | metastasis | IV | 18 | male   | 539 | alive | anti-CTLA4 | NR | PD |
| SRR2768790 | metastatic melanoma | metastasis | IV | 32 | male   | 50  | dead  | anti-CTLA4 | NR | PD |
| SRR2769286 | metastatic melanoma | metastasis | IV | 38 | male   | 532 | dead  | anti-CTLA4 | NR | PD |
| SRR2770067 | metastatic melanoma | metastasis | IV | 44 | male   | 205 | dead  | anti-CTLA4 | NR | PD |
| SRR2770550 | metastatic melanoma | metastasis | IV | 67 | female | 90  | dead  | anti-CTLA4 | NR | NR |
| SRR2771331 | metastatic melanoma | metastasis | IV | 52 | female | 54  | dead  | anti-CTLA4 | NR | PD |
| SRR2771975 | metastatic melanoma | metastasis | IV | 39 | male   | 79  | dead  | anti-CTLA4 | NR | PD |
| SRR2772054 | metastatic melanoma | metastasis | IV | 25 | female | 332 | dead  | anti-CTLA4 | NR | PD |
| SRR2773626 | metastatic melanoma | metastasis | IV | 47 | female | 70  | dead  | anti-CTLA4 | NR | PD |
| SRR2773750 | metastatic melanoma | metastasis | IV | 73 | male   | 140 | dead  | anti-CTLA4 | NR | PD |
| SRR2774183 | metastatic melanoma | metastasis | IV | 77 | male   | 65  | dead  | anti-CTLA4 | NR | PD |
| SRR2774324 | metastatic melanoma | metastasis | IV | 68 | male   | 235 | dead  | anti-CTLA4 | NR | PD |
| SRR2774418 | metastatic melanoma | metastasis | IV | 48 | female | 163 | dead  | anti-CTLA4 | NR | PD |
| SRR2774559 | metastatic melanoma | metastasis | IV | 76 | male   | 320 | dead  | anti-CTLA4 | NA | PD |
| SRR2774969 | metastatic melanoma | metastasis | IV | 63 | male   | 224 | dead  | anti-CTLA4 | NR | PD |
| SRR2775168 | metastatic melanoma | metastasis | IV | 49 | male   | 123 | dead  | anti-CTLA4 | NR | PD |
| SRR2775456 | metastatic melanoma | metastasis | IV | 68 | male   | 204 | dead  | anti-CTLA4 | NR | PD |
| SRR2775592 | metastatic melanoma | metastasis | IV | 64 | male   | 128 | dead  | anti-CTLA4 | NR | PD |
| SRR2776179 | metastatic melanoma | metastasis | IV | 86 | male   | 272 | dead  | anti-CTLA4 | NR | PD |
| SRR2776798 | metastatic melanoma | metastasis | IV | 75 | female | 37  | dead  | anti-CTLA4 | NR | PD |
| SRR2777326 | metastatic melanoma | metastasis | IV | 83 | male   | 458 | dead  | anti-CTLA4 | NR | PD |
| SRR2777738 | metastatic melanoma | metastasis | IV | 43 | female | 313 | dead  | anti-CTLA4 | NR | PD |

|            |                     |            |    |    |        |     |      |            |    |    |
|------------|---------------------|------------|----|----|--------|-----|------|------------|----|----|
| SRR2777872 | metastatic melanoma | metastasis | IV | 71 | female | 193 | dead | anti-CTLA4 | NR | PD |
| SRR2777977 | metastatic melanoma | metastasis | IV | 62 | male   | 492 | dead | anti-CTLA4 | NR | PD |
| SRR2778175 | metastatic melanoma | metastasis | IV | 79 | male   | 152 | dead | anti-CTLA4 | NR | PD |
| SRR2778237 | metastatic melanoma | metastasis | IV | 69 | male   | 250 | dead | anti-CTLA4 | NR | PD |
| SRR2778365 | metastatic melanoma | metastasis | IV | 76 | male   | 45  | dead | anti-CTLA4 | NR | PD |
| SRR2778705 | metastatic melanoma | metastasis | IV | 68 | male   | 67  | dead | anti-CTLA4 | NR | NR |
| SRR2779219 | metastatic melanoma | metastasis | IV | 36 | male   | 224 | dead | anti-CTLA4 | NR | PD |
| SRR2779901 | metastatic melanoma | metastasis | IV | 59 | male   | 175 | dead | anti-CTLA4 | NR | PD |
| SRR2780177 | metastatic melanoma | metastasis | IV | 32 | male   | 257 | dead | anti-CTLA4 | NR | SD |
| SRR2648109 | NSCLC               | Lung       | IV | 57 | male   | 435 | NA   | anti-PD1   | R  | PR |
| SRR2648113 | NSCLC               | Lung       | IV | 61 | female | 294 | NA   | anti-PD1   | R  | PR |
| SRR2648117 | NSCLC               | Lung       | IV | 65 | female | 126 | NA   | anti-PD1   | R  | PR |
| SRR2648119 | NSCLC               | Lung       | IV | 80 | male   | 249 | NA   | anti-PD1   | R  | PR |
| SRR2648123 | NSCLC               | Lung       | IV | 63 | female | 440 | NA   | anti-PD1   | R  | PR |
| SRR2648133 | NSCLC               | Lung       | IV | 66 | male   | 438 | NA   | anti-PD1   | R  | PR |
| SRR2648141 | NSCLC               | Lung       | IV | 78 | female | 313 | NA   | anti-PD1   | R  | PR |
| SRR2648143 | NSCLC               | Lung       | IV | 60 | female | 498 | NA   | anti-PD1   | R  | PR |
| SRR2648147 | NSCLC               | Lung       | IV | 63 | female | 251 | NA   | anti-PD1   | R  | PR |
| SRR2648149 | NSCLC               | Lung       | IV | 68 | male   | 819 | NA   | anti-PD1   | R  | PR |
| SRR2648151 | NSCLC               | Lung       | IV | 64 | female | 377 | NA   | anti-PD1   | R  | PR |
| SRR2648169 | NSCLC               | Lung       | IV | 57 | female | 133 | NA   | anti-PD1   | R  | PR |
| SRR2648103 | NSCLC               | Lung       | IV | 59 | male   | 251 | NA   | anti-PD1   | NR | SD |
| SRR2648105 | NSCLC               | Lung       | IV | 64 | male   | 55  | NA   | anti-PD1   | NR | PD |
| SRR2648107 | NSCLC               | Lung       | IV | 73 | female | 195 | NA   | anti-PD1   | NR | SD |
| SRR2648111 | NSCLC               | Lung       | IV | 57 | male   | 119 | NA   | anti-PD1   | NR | SD |
| SRR2648115 | NSCLC               | Lung       | IV | 50 | male   | 57  | NA   | anti-PD1   | NR | PD |
| SRR2648121 | NSCLC               | Lung       | IV | 59 | male   | 56  | NA   | anti-PD1   | NR | PD |
| SRR2648125 | NSCLC               | Lung       | IV | 60 | male   | 98  | NA   | anti-PD1   | NR | PD |
| SRR2648127 | NSCLC               | Lung       | IV | 64 | female | 244 | NA   | anti-PD1   | NR | SD |
| SRR2648129 | NSCLC               | Lung       | IV | 62 | female | 105 | NA   | anti-PD1   | NR | SD |
| SRR2648131 | NSCLC               | Lung       | IV | 56 | female | 189 | NA   | anti-PD1   | NR | SD |
| SRR2648135 | NSCLC               | Lung       | IV | 56 | male   | 54  | NA   | anti-PD1   | NR | PD |
| SRR2648137 | NSCLC               | Lung       | IV | 41 | female | 56  | NA   | anti-PD1   | NR | PD |
| SRR2648139 | NSCLC               | Lung       | IV | 63 | male   | 41  | NA   | anti-PD1   | NR | PD |
| SRR2648145 | NSCLC               | Lung       | IV | 71 | male   | 64  | NA   | anti-PD1   | NR | PD |
| SRR2648153 | NSCLC               | Lung       | IV | 59 | male   | 250 | NA   | anti-PD1   | NR | SD |
| SRR2648155 | NSCLC               | Lung       | IV | 51 | female | 103 | NA   | anti-PD1   | NR | PD |
| SRR2648157 | NSCLC               | Lung       | IV | 66 | male   | 62  | NA   | anti-PD1   | NR | PD |
| SRR2648159 | NSCLC               | Lung       | IV | 71 | female | 124 | NA   | anti-PD1   | NR | SD |
| SRR2648161 | NSCLC               | Lung       | IV | 57 | female | 188 | NA   | anti-PD1   | NR | SD |

|                 |       |      |    |    |        |      |    |                     |    |    |
|-----------------|-------|------|----|----|--------|------|----|---------------------|----|----|
| SRR2648163      | NSCLC | Lung | IV | 49 | male   | 57   | NA | anti-PD1            | NR | PD |
| SRR2648165      | NSCLC | Lung | IV | 68 | female | 250  | NA | anti-PD1            | NR | SD |
| SRR2648167      | NSCLC | Lung | IV | 76 | female | 58   | NA | anti-PD1            | NR | PD |
| 19_indel.vcf.gz | NSCLC | Lung | IV | 59 | male   | 863  | NA | anti-PD1+anti-CTLA4 | R  | PR |
| 34_indel.vcf.gz | NSCLC | Lung | IV | 76 | male   | 670  | NA | anti-PD1+anti-CTLA4 | R  | PR |
| 2_indel.vcf.gz  | NSCLC | Lung | IV | 72 | male   | 204  | NA | anti-PD1+anti-CTLA4 | R  | PR |
| 7_indel.vcf.gz  | NSCLC | Lung | IV | 56 | male   | 1158 | NA | anti-PD1+anti-CTLA4 | R  | PR |
| 40_indel.vcf.gz | NSCLC | Lung | IV | 73 | male   | 243  | NA | anti-PD1+anti-CTLA4 | R  | PR |
| 30_indel.vcf.gz | NSCLC | Lung | IV | 75 | male   | 636  | NA | anti-PD1+anti-CTLA4 | R  | PR |
| 21_indel.vcf.gz | NSCLC | Lung | IV | 74 | female | 648  | NA | anti-PD1+anti-CTLA4 | R  | CR |
| 26_indel.vcf.gz | NSCLC | Lung | IV | 60 | female | 690  | NA | anti-PD1+anti-CTLA4 | R  | PR |
| 41_indel.vcf.gz | NSCLC | Lung | IV | 53 | male   | 406  | NA | anti-PD1+anti-CTLA4 | R  | CR |
| 37_indel.vcf.gz | NSCLC | Lung | IV | 57 | female | 571  | NA | anti-PD1+anti-CTLA4 | R  | PR |
| 12_indel.vcf.gz | NSCLC | Lung | IV | 82 | male   | 785  | NA | anti-PD1+anti-CTLA4 | R  | PR |
| 32_indel.vcf.gz | NSCLC | Lung | IV | 50 | female | 570  | NA | anti-PD1+anti-CTLA4 | R  | CR |
| 33_indel.vcf.gz | NSCLC | Lung | IV | 74 | male   | 649  | NA | anti-PD1+anti-CTLA4 | R  | PR |
| 38_indel.vcf.gz | NSCLC | Lung | IV | 66 | male   | 235  | NA | anti-PD1+anti-CTLA4 | R  | PR |
| 23_indel.vcf.gz | NSCLC | Lung | IV | 75 | female | 240  | NA | anti-PD1+anti-CTLA4 | R  | PR |

|                 |       |      |    |    |        |     |    |                     |    |    |
|-----------------|-------|------|----|----|--------|-----|----|---------------------|----|----|
| 18_indel.vcf.gz | NSCLC | Lung | IV | 69 | female | 892 | NA | anti-PD1+anti-CTLA4 | R  | PR |
| 14_indel.vcf.gz | NSCLC | Lung | IV | 43 | female | 50  | NA | anti-PD1+anti-CTLA4 | NR | PD |
| 24_indel.vcf.gz | NSCLC | Lung | IV | 85 | female | 68  | NA | anti-PD1+anti-CTLA4 | NR | PD |
| 29_indel.vcf.gz | NSCLC | Lung | IV | 50 | female | 78  | NA | anti-PD1+anti-CTLA4 | NR | PD |
| 35_indel.vcf.gz | NSCLC | Lung | IV | 66 | female | 70  | NA | anti-PD1+anti-CTLA4 | NR | PD |
| 3_indel.vcf.gz  | NSCLC | Lung | IV | 61 | female | 44  | NA | anti-PD1+anti-CTLA4 | NR | SD |
| 10_indel.vcf.gz | NSCLC | Lung | IV | 72 | male   | 163 | NA | anti-PD1+anti-CTLA4 | NR | SD |
| 20_indel.vcf.gz | NSCLC | Lung | IV | 54 | male   | 43  | NA | anti-PD1+anti-CTLA4 | NR | PD |
| 8_indel.vcf.gz  | NSCLC | Lung | IV | 58 | male   | 90  | NA | anti-PD1+anti-CTLA4 | NR | SD |
| 15_indel.vcf.gz | NSCLC | Lung | IV | 53 | female | 1   | NA | anti-PD1+anti-CTLA4 | NR | PD |
| 25_indel.vcf.gz | NSCLC | Lung | IV | 65 | male   | 664 | NA | anti-PD1+anti-CTLA4 | NR | SD |
| 31_indel.vcf.gz | NSCLC | Lung | IV | 67 | female | 70  | NA | anti-PD1+anti-CTLA4 | NR | PD |
| 36_indel.vcf.gz | NSCLC | Lung | IV | 62 | female | 400 | NA | anti-PD1+anti-CTLA4 | NR | SD |
| 4_indel.vcf.gz  | NSCLC | Lung | IV | 64 | male   | 113 | NA | anti-PD1+anti-CTLA4 | NR | SD |
| 11_indel.vcf.gz | NSCLC | Lung | IV | 58 | female | 235 | NA | anti-PD1+anti-CTLA4 | NR | SD |
| 9_indel.vcf.gz  | NSCLC | Lung | IV | 68 | female | 233 | NA | anti-PD1+anti-CTLA4 | NR | SD |

|                 |       |      |    |    |        |     |    |                     |    |    |
|-----------------|-------|------|----|----|--------|-----|----|---------------------|----|----|
| 16_indel.vcf.gz | NSCLC | Lung | IV | 67 | male   | 109 | NA | anti-PD1+anti-CTLA4 | NR | SD |
| 42_indel.vcf.gz | NSCLC | Lung | IV | 59 | male   | 118 | NA | anti-PD1+anti-CTLA4 | NR | SD |
| 5_indel.vcf.gz  | NSCLC | Lung | IV | 57 | male   | 227 | NA | anti-PD1+anti-CTLA4 | NR | SD |
| 22_indel.vcf.gz | NSCLC | Lung | IV | 72 | male   | 75  | NA | anti-PD1+anti-CTLA4 | NR | PD |
| 17_indel.vcf.gz | NSCLC | Lung | IV | 68 | female | 363 | NA | anti-PD1+anti-CTLA4 | NR | SD |
| 27_indel.vcf.gz | NSCLC | Lung | IV | 55 | male   | 123 | NA | anti-PD1+anti-CTLA4 | NR | SD |
| 28_indel.vcf.gz | NSCLC | Lung | IV | 77 | female | 512 | NA | anti-PD1+anti-CTLA4 | NR | SD |
| 1_indel.vcf.gz  | NSCLC | Lung | IV | 70 | female | 42  | NA | anti-PD1+anti-CTLA4 | NR | PD |
| 43_indel.vcf.gz | NSCLC | Lung | IV | 58 | female | 153 | NA | anti-PD1+anti-CTLA4 | NR | SD |
| 6_indel.vcf.gz  | NSCLC | Lung | IV | 67 | female | 111 | NA | anti-PD1+anti-CTLA4 | NR | SD |
| 13_indel.vcf.gz | NSCLC | Lung | IV | 76 | male   | 719 | NA | anti-PD1+anti-CTLA4 | NR | SD |

Response (R) includes: complete response (CR), partial response (PR) and long-term-benefit (LTB). Non-responders (NR) includes: stable disease (SD), progressive disease (PD), and minimal-or-no-benefit (MNB). OS: overall survival.

**Table S2.** Genes in biological pathways used for calculating P-TMB.

|                                         |                                                                                                                                                                                                                                                                                                                                                                                                                                                                                                                                                                                                                                                                                                                                                                                                                                                                                                                                                                                                    |
|-----------------------------------------|----------------------------------------------------------------------------------------------------------------------------------------------------------------------------------------------------------------------------------------------------------------------------------------------------------------------------------------------------------------------------------------------------------------------------------------------------------------------------------------------------------------------------------------------------------------------------------------------------------------------------------------------------------------------------------------------------------------------------------------------------------------------------------------------------------------------------------------------------------------------------------------------------------------------------------------------------------------------------------------------------|
| Neutrophil extracellular trap formation | FCGR3A, FCGR3B, SYK, MAP3K7, RAF1, MAP2K1, MAP2K2, MAPK1, MAPK3, SIGLEC9, CYBB, NCF1, CYBA, NCF2, NCF4, RAC1, RAC2, TLR7, TLR8, ELANE, MPO, ACTG1, ACTB, VDAC1, VDAC2, VDAC3, SLC25A4, SLC25A5, SLC25A6, SLC25A31, PPIF, PADI4, IGH, FCGR1A, FCGR2A, ITGAM, ITGB2, ITGAL, CLEC7A, SRC, PLCB1, PLCB2, PLCB3, PLCB4, PLCG1, PLCG2, PRKCA, PRKCB, PRKCG, ATG7, FPR1, FPR3, FPR2, PIK3CA, PIK3CD, PIK3CB, PIK3R1, PIK3R2, PIK3R3, AKT1, AKT2, AKT3, MTOR, NFKB1, RELA, C3, CR1, CR1L, C5, C5AR1, HMGB1, TLR2, TLR4, MAPK11, MAPK12, MAPK13, MAPK14, ITGA2B, ITGB3, FGA, FGB, FGG, GP1BA, VWF, SELP, SELPLG, AGER, CASP4, CASP1, GSDMD, HAT1, H2AX, H2AC20, H2AC12, H2AC1, H2AW, H2AB3, H2AC8, H2AC4, MACROH2A2, MACROH2A1, H2AC19, H2AJ, H2AB1, H2AC17, H2AC18, H2AC11, H2AC21, H2AZ2, H2AC7, H2AZ1, H2AC15, H2AC6, H2AC13, H2AC14, H2AC16, H2AB2, H2BC15, H2BC9, H2BC14, H2BW1, H2BC1, H2BC18, H2BC17, H2BC3, H2BC8, H2BC13, H2BC4, H2BC5, H2BC6, H2BC10, H2BC21, H2BC11, H2BC12, H2BU1, H2BC7, H2BW2 |
|-----------------------------------------|----------------------------------------------------------------------------------------------------------------------------------------------------------------------------------------------------------------------------------------------------------------------------------------------------------------------------------------------------------------------------------------------------------------------------------------------------------------------------------------------------------------------------------------------------------------------------------------------------------------------------------------------------------------------------------------------------------------------------------------------------------------------------------------------------------------------------------------------------------------------------------------------------------------------------------------------------------------------------------------------------|



|                            |                                                                                                                                                                                                                                                                                                                                                                                                                                                                                                                                                                                                                                                                                                                                                                                                                                                                                                                                                                                                                                                                                                                                                                                                                                                                                                                                                                                                                                                                                                                                                                                                                                                                                                                                                                                                                                                                                                                                                                                                                                                        |
|----------------------------|--------------------------------------------------------------------------------------------------------------------------------------------------------------------------------------------------------------------------------------------------------------------------------------------------------------------------------------------------------------------------------------------------------------------------------------------------------------------------------------------------------------------------------------------------------------------------------------------------------------------------------------------------------------------------------------------------------------------------------------------------------------------------------------------------------------------------------------------------------------------------------------------------------------------------------------------------------------------------------------------------------------------------------------------------------------------------------------------------------------------------------------------------------------------------------------------------------------------------------------------------------------------------------------------------------------------------------------------------------------------------------------------------------------------------------------------------------------------------------------------------------------------------------------------------------------------------------------------------------------------------------------------------------------------------------------------------------------------------------------------------------------------------------------------------------------------------------------------------------------------------------------------------------------------------------------------------------------------------------------------------------------------------------------------------------|
| MAPK signaling pathway     | AKT1, AKT2, AKT3, ARRB1, ARRB2, ATF2, ATF4, BDNF, BRAF, CACNA1A, CACNA1B, CACNA1C, CACNA1D, CACNA1E, CACNA1F, CACNA1G, CACNA1H, CACNA1I, CACNA1S, CACNA2D1, CACNA2D2, CACNA2D3, CACNA2D4, CACNB1, CACNB2, CACNB3, CACNB4, CACNG1, CACNG2, CACNG3, CACNG4, CACNG5, CACNG6, CACNG7, CACNG8, CASP3, CD14, CDC25B, CDC42, CHP1, CHP2, CHUK, CRK, CRKL, DAXX, DDIT3, DUSP1, DUSP10, DUSP14, DUSP16, DUSP2, DUSP3, DUSP4, DUSP5, DUSP6, DUSP7, DUSP8, DUSP9, ECSIT, EGF, EGFR, ELK1, ELK4, FAS, FASLG, FGF1, FGF10, FGF11, FGF12, FGF13, FGF14, FGF16, FGF17, FGF18, FGF19, FGF2, FGF20, FGF21, FGF22, FGF23, FGF3, FGF4, FGF5, FGF6, FGF7, FGF8, FGF9, FGFR1, FGFR2, FGFR3, FGFR4, FLNA, FLNB, FLNC, FOS, GADD45A, GADD45B, GADD45G, GNA12, GNG12, GRB2, HRAS, HSPA1A, HSPA1B, HSPA1L, HSPA2, HSPA6, HSPA8, HSPB1, IKBKB, IKBKG, IL1A, IL1B, IL1R1, IL1R2, JMJD7-PLA2G4B, JUN, JUND, KRAS, LAMTOR3, MAP2K1, MAP2K2, MAP2K3, MAP2K4, MAP2K5, MAP2K6, MAP2K7, MAP3K1, MAP3K11, MAP3K12, MAP3K13, MAP3K14, MAP3K2, MAP3K20, MAP3K3, MAP3K4, MAP3K5, MAP3K6, MAP3K7, MAP3K8, MAP4K1, MAP4K2, MAP4K3, MAP4K4, MAPK1, MAPK10, MAPK11, MAPK12, MAPK13, MAPK14, MAPK3, MAPK7, MAPK8, MAPK8IP1, MAPK8IP2, MAPK8IP3, MAPK9, MAPKAPK2, MAPKAPK3, MAPKAPK5, MAPT, MAX, MECOM, MEF2C, MKNK1, MKNK2, MOS, MRAS, MYC, NF1, NFATC2, NFATC4, NFKB1, NFKB2, NGF, NLK, NR4A1, NRAS, NTF3, NTF4, NTRK1, NTRK2, PAK1, PAK2, PDGFA, PDGFB, PDGFRA, PDGFRB, PLA2G10, PLA2G12A, PLA2G12B, PLA2G1B, PLA2G2A, PLA2G2C, PLA2G2D, PLA2G2E, PLA2G2F, PLA2G3, PLA2G4A, PLA2G4B, PLA2G4E, PLA2G5, PLA2G6, PPM1A, PPM1B, PPP3CA, PPP3CB, PPP3CC, PPP3R1, PPP3R2, PPP5C, PRKACA, PRKACB, PRKACG, PRKCA, PRKCB, PRKCG, PRKX, PTPN5, PTPN7, PTPRR, RAC1, RAC2, RAC3, RAF1, RAP1A, RAP1B, RAPGEF2, RASA1, RASA2, RASGRF1, RASGRF2, RASGRP1, RASGRP2, RASGRP3, RASGRP4, RELA, RELB, RPS6KA1, RPS6KA2, RPS6KA3, RPS6KA4, RPS6KA5, RPS6KA6, RRAS, RRAS2, SOS1, SOS2, SRF, STK3, STK4, STMN1, TAB1, TAB2, TAOK1, TAOK2, TAOK3, TGFB1, TGFB2, TGFB3, TGFB1, TGFB2, TNF, TNFRSF1A, TP53, TRAF2, TRAF6 |
| Base excision repair       | APEX1, APEX2, FEN1, HMGB1, HMGB1P1, HMGB1P40, LIG1, LIG3, MBD4, MPG, MUTYH, NEIL1, NEIL2, NEIL3, NTHL1, OGG1, PARP1, PARP2, PARP3, PARP4, PCNA, POLB, POLD1, POLD2, POLD3, POLD4, POLE, POLE2, POLE3, POLE4, POLL, SMUG1, TDG, UNG, XRCC1                                                                                                                                                                                                                                                                                                                                                                                                                                                                                                                                                                                                                                                                                                                                                                                                                                                                                                                                                                                                                                                                                                                                                                                                                                                                                                                                                                                                                                                                                                                                                                                                                                                                                                                                                                                                              |
| Mismatch repair            | SSBP1, PMS2, MLH1, MSH6, MSH2, MSH3, MLH3, RFC1, RFC4, RFC2, RFC5, RFC3, PCNA, EXO1, RPA1, RPA2, RPA3, RPA4, POLD1, POLD2, POLD3, POLD4, LIG1                                                                                                                                                                                                                                                                                                                                                                                                                                                                                                                                                                                                                                                                                                                                                                                                                                                                                                                                                                                                                                                                                                                                                                                                                                                                                                                                                                                                                                                                                                                                                                                                                                                                                                                                                                                                                                                                                                          |
| Chemokine Receptors        | C5AR1, ACKR2, CCR1, CCR10, CCR3, CCR4, CCR5, CCR6, CCR7, CCR8, CCR9, ACKR4, CCRL2, CMKLR1, CX3CR1, CXCR3, CXCR4, CXCR5, CXCR6, ACKR3, CYSLTR1, CYSLTR2, ACKR1, EDNRA, EDNRB, FPR1, FPR2, GPR17, GPR32, GPR33, PTGDR2, C5AR2, CXCR1, CXCR2, LTB4R, LTB4R2, PLAUR, PLXNA1, PLXNA2, PLXNA3, PLXNA4, PLXNB1, PLXNB2, PLXNB3, PLXNC1, PLXND1, PTAFR, ROBO1, ROBO2, ROBO3, RXFP3, XCR1                                                                                                                                                                                                                                                                                                                                                                                                                                                                                                                                                                                                                                                                                                                                                                                                                                                                                                                                                                                                                                                                                                                                                                                                                                                                                                                                                                                                                                                                                                                                                                                                                                                                       |
| Autoimmune thyroid disease | CD28, CD40, CD40LG, CD80, CD86, CGA, CTLA4, FAS, FASLG, GZMB, HLA-A, HLA-B, HLA-C, HLA-DMA, HLA-DMB, HLA-DOA, HLA-DOB, HLA-DPA1, HLA-DPB1, HLA-DQA1, HLA-DQA2, HLA-DQB1, HLA-DRA, HLA-DRB1, HLA-DRB3, HLA-DRB4, HLA-DRB5, HLA-E, HLA-F, HLA-G, IFNA1, IFNA10, IFNA13, IFNA14, IFNA16, IFNA17, IFNA2, IFNA21, IFNA4, IFNA5, IFNA6, IFNA7, IFNA8, IL10, IL2, IL4, IL5, PRF1, TG, TPO, TSHB, TSHR                                                                                                                                                                                                                                                                                                                                                                                                                                                                                                                                                                                                                                                                                                                                                                                                                                                                                                                                                                                                                                                                                                                                                                                                                                                                                                                                                                                                                                                                                                                                                                                                                                                         |
| Pentose phosphate pathway  | ALDOA, ALDOB, ALDOC, DERA, FBP1, FBP2, G6PD, GPI, H6PD, PFKL, PFKM, PFKP, PGD, PGLS, PGM1, PGM2, PRPS1, PRPS1L1, PRPS2, RBKS, RPE, RPEL1, RPIA, TALDO1, TKT, TKTL1, TKTL2                                                                                                                                                                                                                                                                                                                                                                                                                                                                                                                                                                                                                                                                                                                                                                                                                                                                                                                                                                                                                                                                                                                                                                                                                                                                                                                                                                                                                                                                                                                                                                                                                                                                                                                                                                                                                                                                              |
| Regulation of autophagy    | ATG12, ATG3, ATG4A, ATG4B, ATG4C, ATG4D, ATG5, ATG7, BECN1, BECN2, GABARAP, GABARAPL1, GABARAPL2, IFNA1, IFNA10, IFNA13, IFNA14, IFNA16, IFNA17, IFNA2, IFNA21, IFNA4, IFNA5, IFNA6, IFNA7, IFNA8, IFNG, INS, PIK3C3, PIK3R4, PRKAA1, PRKAA2, ULK1, ULK2, ULK3                                                                                                                                                                                                                                                                                                                                                                                                                                                                                                                                                                                                                                                                                                                                                                                                                                                                                                                                                                                                                                                                                                                                                                                                                                                                                                                                                                                                                                                                                                                                                                                                                                                                                                                                                                                         |
| Citrate cycle (TCA cycle)  | ACLY, ACO1, ACO2, CS, DLAT, DLD, DLST, FH, IDH1, IDH2, IDH3A, IDH3B, IDH3G, MDH1, MDH2, OGDH, OGDHL, PC, PCK1, PCK2, PDHA1, PDHA2, PDHB, SDHA, SDHB, SDHC, SDHD, SUCLA2, SUCLG1, SUCLG2, SUCLG2P2                                                                                                                                                                                                                                                                                                                                                                                                                                                                                                                                                                                                                                                                                                                                                                                                                                                                                                                                                                                                                                                                                                                                                                                                                                                                                                                                                                                                                                                                                                                                                                                                                                                                                                                                                                                                                                                      |

---

|                                  |                                                                                                   |
|----------------------------------|---------------------------------------------------------------------------------------------------|
| Terpenoid back-bone biosynthesis | ACAT1, ACAT2, DHDDS, FDPS, GGPS1, HMGCR, HMGCS1, HMGCS2, IDI1, IDI2, MVD, MVK, PDSS1, PDSS2, PMVK |
| DNA checkpoints                  | DNACHK, MDC1, ATM, ATR, BRCA1, CHEK1, CHEK2, TP53BP1                                              |
| TGFb Family Members Receptors    | ACVR1B, ACVR1C, ACVR2A, ACVR2B, ACVRL1, AMHR2, BMPR1A, BMPR1B, BMPR2, TGFBR1, TGFBR2, TGFBR3      |

---
